# Supplementary material for: Constructing and Validating a Nomogram Model for Short-Term Prognosis of Patients with AChR-Ab+ GMG
Source: Springer Nature journal article supplement (doi:10.1007/s40120-024-00590-0), 2024-03-01
Supplement: MOESM1 [file 26809656]

## Supplementary Material

### **Constructing and validating a Nomogram model for short-term prognosis of patients with AChR-Ab+ GMG**

Feng Liang<sup>1,2</sup>, Zhaoxu Yin<sup>3</sup>, Yaqian Li<sup>1,2</sup>, Guanxi Li<sup>1,2</sup>, Jing Ma<sup>1,2</sup>, Huiqiu Zhang<sup>1,2</sup>, Xiaoqian Xia<sup>2</sup>, Make Yao<sup>4</sup>, Xiaomin Pang<sup>1</sup>, Juan Wang<sup>1</sup>, Xueli Chang<sup>1</sup>, Junhong Guo<sup>1</sup>, Wei Zhang<sup>1#</sup>

1Department of Neurology, the First Hospital of Shanxi Medical University, Taiyuan, China

2First Clinical Medical College, Shanxi Medical University, Taiyuan, China

3 Taiyuan City Central Hospital, Department of Neurology, Taiyuan, China

4 Shanxi Medical University, Taiyuan, China

#Correspondence to:

Wei Zhang

Institute: Department of Neurology, First Hospital, Shanxi Medical University,  
Address: No.85, Jiefang South Street, Taiyuan, China

E-mail: zhangvey@126.com;

---

Supplementary Table1 Overview of the included study indicators

| Characteristics            | Poor efficacy          | Good efficacy        | P value |
|----------------------------|------------------------|----------------------|---------|
| n                          | 30                     | 60                   |         |
| Age of onset, median (IQR) | 54.5 (41.5, 59.5)      | 56.5 (41.5, 67.25)   | 0.296   |
| QMG, median (IQR)          | 12.5 (10.25, 15.75)    | 12 (9.75, 16.25)     | 0.677   |
| BMI, mean $\pm$ sd         | 24.191 $\pm$ 3.3908    | 25.622 $\pm$ 4.3979  | 0.093   |
| Duration, median (IQR)     | 8 (1.5, 26.25)         | 5 (2, 15)            | 0.221   |
| RBC, median (IQR)          | 4.55 (4.1425, 4.975)   | 4.615 (4.33, 4.98)   | 0.376   |
| Hb, median (IQR)           | 138 (127.25, 145.25)   | 144 (135.75, 155.25) | 0.098   |
| WBC, median (IQR)          | 6.35 (5.425, 9.05)     | 6 (4.85, 6.85)       | 0.145   |
| LYM, median (IQR)          | 1.915 (1.5175, 2.5125) | 1.7 (1.4, 2.13)      | 0.271   |
| PH, median (IQR)           | 7.41 (7.3925, 7.43)    | 7.41 (7.39, 7.41)    | 0.346   |
| PO2, median (IQR)          | 75.32 (69.5, 79.875)   | 75.64 (71, 79)       | 0.917   |
| PCO2, median (IQR)         | 40.59 (38.25, 44.025)  | 40.59 (38.55, 42.4)  | 0.619   |
| AChR-Ab, n (%)             |                        |                      | 0.393   |
| <10                        | 16 (17.8%)             | 32 (35.6%)           |         |
| >.20                       | 7 (7.8%)               | 8 (8.9%)             |         |
| 10~20                      | 7 (7.8%)               | 20 (22.2%)           |         |
| Titin-Ab, n (%)            |                        |                      | 0.361   |
| Positive                   | 10 (11.1%)             | 26 (28.9%)           |         |
| Negative                   | 20 (22.2%)             | 34 (37.8%)           |         |
| RNS, n (%)                 |                        |                      | 1.000   |
| Negative                   | 5 (5.6%)               | 10 (11.1%)           |         |
| Positive                   | 25 (27.8%)             | 50 (55.6%)           |         |
| Gender, n (%)              |                        |                      | 0.025   |
| Female                     | 19 (21.1%)             | 23 (25.6%)           |         |
| Male                       | 11 (12.2%)             | 37 (41.1%)           |         |
| Hypertensionn, n (%)       |                        |                      | 0.213   |

|                           |            |            |       |
|---------------------------|------------|------------|-------|
| No                        | 22 (24.4%) | 36 (40%)   |       |
| Yes                       | 8 (8.9%)   | 24 (26.7%) |       |
| Smoke, n (%)              |            |            | 0.742 |
| No                        | 22 (24.4%) | 42 (46.7%) |       |
| Yes                       | 8 (8.9%)   | 18 (20%)   |       |
| Drink, n (%)              |            |            | 0.549 |
| No                        | 26 (28.9%) | 49 (54.4%) |       |
| Yes                       | 4 (4.4%)   | 11 (12.2%) |       |
| Extraocular, n (%)        |            |            | 0.119 |
| Yes                       | 22 (24.4%) | 52 (57.8%) |       |
| No                        | 8 (8.9%)   | 8 (8.9%)   |       |
| Palpebralis, n (%)        |            |            | 0.067 |
| Yes                       | 18 (20%)   | 47 (52.2%) |       |
| No                        | 12 (13.3%) | 13 (14.4%) |       |
| Bulbar, n (%)             |            |            | 0.446 |
| No                        | 23 (25.6%) | 50 (55.6%) |       |
| Yes                       | 7 (7.8%)   | 10 (11.1%) |       |
| Vegetative, n (%)         |            |            | 0.607 |
| No                        | 24 (26.7%) | 52 (57.8%) |       |
| Yes                       | 6 (6.7%)   | 8 (8.9%)   |       |
| Thymoma, n (%)            |            |            | 0.569 |
| No                        | 25 (27.8%) | 54 (60%)   |       |
| Yes                       | 5 (5.6%)   | 6 (6.7%)   |       |
| Thymic_hyperplasia, n (%) |            |            | 0.025 |
| No                        | 28 (31.1%) | 44 (48.9%) |       |
| Yes                       | 2 (2.2%)   | 16 (17.8%) |       |
| MGFA, n (%)               |            |            | 0.292 |
| IIA                       | 11 (12.2%) | 21 (23.3%) |       |
| IIB                       | 4 (4.4%)   | 12 (13.3%) |       |
| IIIA                      | 8 (8.9%)   | 10 (11.1%) |       |

|       |          |            |
|-------|----------|------------|
| III B | 3 (3.3%) | 14 (15.6%) |
| IV B  | 3 (3.3%) | 3 (3.3%)   |
| V     | 1 (1.1%) | 0 (0%)     |

---
